# Supplementary material for: Dynamics and functional interplay of histone lysine butyrylation, crotonylation, and acetylation in rice under starvation and submergence
Source: Genome Biol. 2018 Sep 25;19:144. doi: 10.1186/s13059-018-1533-y (PMC6154804; doi:10.1186/s13059-018-1533-y)
Supplement: Supplementary file 2 — LC-MS results. (XLSX 76 kb) [file 13059_2018_1533_MOESM2_ESM.xlsx]

## Sheet: Summary
		Exp.1				Exp.2
		Rep.1		Rep.2		Rep.1		Rep.2
Gene name	Position	Butyl	Crotonyl	Butyl	Crotonyl	Butyl	Crotonyl	Butyl	Crotonyl
H2A	5		*		*		*		*
H2A	13		*		*		*
H2A	21		*				*		*
H2A	39		*				*		*
H2A	120		*				*		*
H2A	126		*		*		*
H2AV	6		*				*		*
H2AV	12		*				*		*
H2AV	17		*		*		*		*
H2AV	22		*		*		*		*
H2AV	24		*				*
H2AV	129				*				*
H2AV	134		*		*		*		*
H2B	6		*		*		*		*
H2B	7		*		*
H2B	11		*				*		*
H2B	12		*		*
H2B	22		*		*		*		*
H2B	25		*				*		*
H2B	30		*
H2B	31		*
H2B	33				*
H2B	42	*	*				*		*
H2B	45		*				*		*
H2B	60		*
H2B	66		*				*		*
H2B	71		*						*
H2B	74		*				*		*
H2B	107		*				*		*
H2B	113		*				*		*
H2B	114	*		*
H2B	136		*						*
H2B	144		*				*		*
H2B	148				*
H3	9		*		*
H3	14	*	*	*		*	*	*
H3	23		*		*		*		*
H3	27		*
H3	56		*		*		*		*
H3	79		*		*		*		*
H3	122		*		*		*		*
H4	8				*		*
H4	12	*	*		*
H4	16		*		*
H4	31		*		*				*
H4	79		*		*
H4	91		*		*				*

## Sheet: Butyl exp.1
Protein accession	Position	Amino acid	Protein description	Gene name	Localization probability	PEP	Score	Modified sequence	Charge	Mass error [ppm]	MS/MS Count	Rep.1	Rep.2
Q7GBK0	42	K	Histone H2B.7	H2B	1	0.00572445	82.008	RLPAGK(1)GEK	2	-0.41276	1	*
Q7GBK0	114	K	Histone H2B.7	H2B	1	0.00770583	89.752	K(1)PTITSR	2	1.4284	1	*	*
Q0JCT1	14	K	Histone H3.3	H3	1	0.00923393	101.28	STGGK(1)APR	2	-1.3245	1	*	*
Q7XUC9	12	K	Histone H4	H4	0.832003	0.00354043	93.478	GKGGK(0.146)GLGK(0.832)GGAK(0.022)R	2	-0.59348	2	*

## Sheet: Butyl exp.1 rep.1
Protein accession	Position	Amino acid	Protein description	Gene name	Localization probability	PEP	Score	Modified sequence	Charge	Mass error [ppm]	MS/MS Count
Q0JCT1	14	K	Histone H3.3	H3	1	0.00923393	101.28	STGGK(1)APR	2	-1.3245	1
Q7GBK0	42	K	Histone H2B.7	H2B	1	0.00572445	82.008	RLPAGK(1)GEK	2	-0.41276	1
Q7GBK0	114	K	Histone H2B.7	H2B	1	0.00770583	89.752	K(1)PTITSR	2	1.4284	1
Q7XUC9	12	K	Histone H4	H4	0.832003	0.00354043	93.478	GKGGK(0.146)GLGK(0.832)GGAK(0.022)R	2	-0.59348	2

## Sheet: Butyl exp.1 rep.2
Protein accession	Position	Amino acid	Protein description	Gene name	Localization probability	PEP	Score	Modified sequence	Charge	Mass error [ppm]	MS/MS Count
Q0JCT1	14	K	Histone H3.3	H3	1	0.0251138	96.19	STGGK(1)APR	2	0.56321	2
Q9LGH4	114	K	Histone H2B.6	H2B	1	0.0104808	89.752	K(1)PTITSR	2	-0.04165	1

## Sheet: Crotonyl exp.1
Protein accession	Position	Amino acid	Protein description	Gene name	Localization probability	PEP	Score	Modified sequence	Charge	Mass error [ppm]	MS/MS Count	Rep.1	Rep.2
Q6L500	5	K	Probable histone H2A.4	H2A	1	0.0043683	71.451	MEVGAK(1)VPK	2	-0.024527	1	*	*
Q6ZL42	5	K	Probable histone H2A.2	H2A	1	0.00410734	72.582	GK(1)AIGSGAAK	2	0.64199	1	*	*
Q84NJ4	5	K	Probable histone H2A.3	H2A	1	0.00233784	82.261	GK(1)AIGSSAAK	2	0.39823	1	*	*
Q6L500	5	K	Probable histone H2A.4	H2A	1	0.00495559	71.614	MEVGAK(1)VPK	2	0.62045	2	*	*
Q6ZL42	5	K	Probable histone H2A.2	H2A	1	0.00558513	72.096	GK(1)AIGSGAAK	2	0.70559	1	*	*
Q84NJ4	5	K	Probable histone H2A.3	H2A	1	0.00550607	72.434	GK(1)AIGSSAAK	2	0.94662	1	*	*
Q84MP7	6	K	Probable histone H2A variant 3	H2AV	1	0.00629141	81.632	GGK(1)GLLAAKTTAAK	2	0.50097	1	*
Q8S857	6	K	Probable histone H2A variant 2	H2AV	1	0.00102503	90.707	GGK(1)GLLAAKTTAAK	2	1.3285	2		*
Q94E96	10	K	Probable histone H2A.5	H2A	1	5.07105e-05	134.99	MDAAGAGAGGK(1)LK	2	-0.87049	2	*	*
Q94E96	10	K	Probable histone H2A.5	H2A	1	1.41064e-06	123.95	MDAAGAGAGGK(1)LK	2	-2.0238	3	*	*
Q84MP7	12	K	Probable histone H2A variant 3	H2AV	1	0.000731252	88.596	GLLAAK(1)TTAAK	2	0.73886	1	*
Q94E96	12	K	Probable histone H2A.5	H2A	0.985909	6.43772e-06	143.98	MDAAGAGAGGK(0.014)LK(0.986)K	2	-1.5471	1	*	*
Q8S857	12	K	Probable histone H2A variant 2	H2AV	1	0.00205548	83.045	GLLAAK(1)TTAAK	2	0.51826	2		*
Q94E96	12	K	Probable histone H2A.5	H2A	0.983469	6.64903e-05	124.07	MDAAGAGAGGK(0.017)LK(0.983)K	2	1.4223	1	*	*
Q6ZL42	13	K	Probable histone H2A.2	H2A	0.999998	0.0110708	58.172	GKAIGSGAAK(1)K	2	-1.3671	1	*	*
Q6ZL43	13	K	Probable histone H2A.1	H2A	1	0.0100692	78.342	GKAIGAGAAK(1)K	2	-0.38013	1	*	*
Q84NJ4	13	K	Probable histone H2A.3	H2A	1	0.00248095	93.839	GKAIGSSAAK(1)K	2	0.42031	1	*	*
Q6ZL42	13	K	Probable histone H2A.2	H2A	1	0.00812408	72.531	GKAIGSGAAK(1)K	2	-0.69032	1	*	*
Q6ZL43	13	K	Probable histone H2A.1	H2A	1	0.00530062	79.659	AIGAGAAK(1)K	2	0.66235	2	*	*
Q84NJ4	13	K	Probable histone H2A.3	H2A	1	0.000530403	103.91	GKAIGSSAAK(1)K	2	1.7795	1	*	*
Q2QPG9	16	K	Probable histone H2AXb	H2A	1	0.00360892	117.16	GSK(1)SVSR	2	1.2904	1	*	*
Q2QPG9	16	K	Probable histone H2AXb	H2A	1	0.00547401	117.16	GSK(1)SVSR	2	1.3116	1	*	*
Q84MP7	17	K	Probable histone H2A variant 3	H2AV	1	0.00168503	96.143	TTAAK(1)SAEK	2	1.1268	2	*	*
Q8H7Y8	17	K	Probable histone H2A variant 1	H2AV	1	0.00452663	77.662	TTAAK(1)SADK	2	0.26046	1	*	*
Q8S857	17	K	Probable histone H2A variant 2	H2AV	1	0.00229512	82.494	TTAAK(1)AAADK	2	0.26336	1	*	*
Q84MP7	17	K	Probable histone H2A variant 3	H2AV	1	0.00223956	96.665	TTAAK(1)SAEK	2	0.95693	2	*	*
Q8H7Y8	17	K	Probable histone H2A variant 1	H2AV	1	0.00268447	92.445	TTAAK(1)SADK	2	-0.47372	2	*	*
Q8S857	17	K	Probable histone H2A variant 2	H2AV	1	2.15004e-05	115.91	TTAAK(1)AAADK	2	0.77567	4	*	*
Q6ZL42	21	K	Probable histone H2A.2	H2A	1	2.98657e-05	132.5	SSK(1)AGLQFPVGR	3	0.31424	2	*
Q75L11	21	K	Probable histone H2A.6	H2A	0.99998	0.0315199	64.757	KLGGPK(1)K	2	1.7422	1	*
Q84MP7	21	K	Probable histone H2A variant 3	H2AV	0.997022	0.00080383	117.86	TTAAK(0.003)SAEK(0.997)DK	2	0.022696	1	*	*
Q6ZL43	21	K	Probable histone H2A.1	H2A	1	3.95158e-05	122.55	SSK(1)AGLQFPVGR	3	1.3811	2		*
Q84MP7	21	K	Probable histone H2A variant 3	H2AV	0.999038	3.64222e-05	143	TTAAK(0.001)SAEK(0.999)DK	2	0.0051314	1	*	*
Q8S857	22	K	Probable histone H2A variant 2	H2AV	0.950868	0.00604169	74.841	AAADK(0.951)DK(0.049)DR	2	-0.16033	3	*	*
Q8S857	22	K	Probable histone H2A variant 2	H2AV	1	0.00192319	96.342	AAADK(1)DK	2	-0.118	3	*	*
Q8S857	24	K	Probable histone H2A variant 2	H2AV	0.883207	0.00641197	74.841	AAADK(0.117)DK(0.883)DR	2	-1.2184	2	*
Q94E96	33	K	Probable histone H2A.5	H2A	1	4.04085e-05	125.72	SVK(1)AGLQFPVGR	3	1.0966	3	*	*
Q94E96	33	K	Probable histone H2A.5	H2A	1	1.81473e-05	134.3	SVK(1)AGLQFPVGR	3	-0.73234	3	*	*
Q6ZL42	39	K	Probable histone H2A.2	H2A	1	0.00803957	76.774	AGK(1)YAER	2	-0.23277	1	*
Q6ZL43	119	K	Probable histone H2A.1	H2A	1	0.000129824	92.098	LLGGATIASGGVMPNIHQHLLPK(1)K	4	-0.74912	1	*	*
Q6ZL43	119	K	Probable histone H2A.1	H2A	1	0.00270331	77.221	LLGGATIASGGVMPNIHQHLLPK(1)K	4	-1.6923	1	*	*
Q6ZL42	120	K	Probable histone H2A.2	H2A	0.994073	4.07095e-09	144.4	K(0.994)AGGSAK(0.006)AAAGDDDN	2	-0.97444	2	*
Q6ZL43	120	K	Probable histone H2A.1	H2A	0.958996	2.83558e-13	190.11	K(0.959)AGSSK(0.041)ASTVDDDDN	2	-0.02472	1	*	*
Q6ZL43	120	K	Probable histone H2A.1	H2A	0.96039	5.39173e-14	186.42	K(0.96)AGSSK(0.04)ASTVDDDDN	2	0.074751	1	*	*
Q2QS71	125	K	Probable histone H2A.7	H2A	1	1.76811e-05	106.58	AGSSK(1)ASHADDDDN	2	0.04537	1	*	*
Q6ZL43	125	K	Probable histone H2A.1	H2A	1	0.00603384	62.68	AGSSK(1)ASTVDDDDN	2	-0.78742	1	*	*
Q2QS71	125	K	Probable histone H2A.7	H2A	1	0.00205164	75.316	AGSSK(1)ASHADDDDN	2	0.2334	1	*	*
Q6ZL43	125	K	Probable histone H2A.1	H2A	1	0.00900939	58.972	AGSSK(1)ASTVDDDDN	2	-1.3973	1	*	*
Q6ZL42	126	K	Probable histone H2A.2	H2A	1	9.00775e-05	101.43	AGGSAK(1)AAAGDDDN	2	0.43394	2	*	*
Q84NJ4	126	K	Probable histone H2A.3	H2A	1	0.00175093	73.881	AGSSAK(1)AAAADDE	2	1.3901	1	*	*
Q6ZL42	126	K	Probable histone H2A.2	H2A	1	0.000322076	98.974	AGGSAK(1)AAAGDDDN	2	0.57732	2	*	*
Q84NJ4	126	K	Probable histone H2A.3	H2A	1	0.00231416	75.088	AGSSAK(1)AAAADDE	2	1.0965	1	*	*
Q2QPG9	127	K	Probable histone H2AXb	H2A	1	0.00931493	61.48	DK(1)ADIGSASQEF	2	-1.5739	1	*	*
Q84MP7	127	K	Probable histone H2A variant 3	H2AV	1	0.000151634	85.046	GTIAGGGVIPHIHK(1)SLINK	4	0.34045	2	*
Q2QPG9	127	K	Probable histone H2AXb	H2A	1	0.00734378	66.393	DK(1)ADIGSASQEF	2	-1.3467	1	*	*
Q8S857	129	K	Probable histone H2A variant 2	H2AV	1	1.17378e-05	101.92	GTIAGGGVIPHIHK(1)SLINK	3	-1.9263	2		*
Q84MP7	132	K	Probable histone H2A variant 3	H2AV	1	0.00810783	75.696	SLINK(1)SSK	2	0.044694	1	*	*
Q84MP7	132	K	Probable histone H2A variant 3	H2AV	1	0.0220536	61.582	SLINK(1)SSK	2	0.21315	1	*	*
Q8H7Y8	133	K	Probable histone H2A variant 1	H2AV	1	0.0115779	74.486	SLINK(1)TSK	2	-1.6553	1		*
Q8S857	134	K	Probable histone H2A variant 2	H2AV	1	0.00346701	89.355	SLINK(1)TAK	2	0.74927	1	*	*
Q8S857	134	K	Probable histone H2A variant 2	H2AV	1	0.00214492	107.69	SLINK(1)TAK	2	-0.7737	1	*	*
Q94E96	136	K	Probable histone H2A.5	H2A	1	0.000652946	107.45	TAEK(1)AAAAGK	2	-0.85939	4	*	*
Q94E96	136	K	Probable histone H2A.5	H2A	1	0.000597744	109.16	TAEK(1)AAAAGK	2	-0.66123	3	*	*
Q94E96	142	K	Probable histone H2A.5	H2A	1	0.0039233	80.231	AAAAGK(1)EAK	2	-1.2573	2	*	*
Q94E96	142	K	Probable histone H2A.5	H2A	1	0.00782089	72.325	AAAAGK(1)EAK	2	-0.55421	1	*	*
Q94E96	145	K	Probable histone H2A.5	H2A	0.991485	0.0115161	71.558	AAAAGK(0.009)EAK(0.991)SPK	2	-0.44329	1	*	*
Q94E96	145	K	Probable histone H2A.5	H2A	0.976942	0.0034386	81.565	AAAAGK(0.023)EAK(0.977)SPK	2	-0.85394	1	*	*
Q94E96	153	K	Probable histone H2A.5	H2A	1	0.015481	79.116	AAGK(1)SPK	2	-0.5812	1		*
Q94E96	156	K	Probable histone H2A.5	H2A	0.998676	0.0213969	65.157	AAGK(0.001)SPK(0.999)K	2	0.85517	1		*
A3AGM4	6	K	Histone H2B.1	H2B	0.999248	0.000296022	147.75	AEK(0.999)K(0.001)PAEK	2	0.22747	2	*	*
Q6ZBP3	6	K	Histone H2B.2	H2B	0.999248	0.000296022	147.75	AEK(0.999)K(0.001)PAEK	2	0.22747	2	*	*
Q7GBK0	6	K	Histone H2B.7	H2B	0.996592	0.00356944	98.233	AEK(0.997)K(0.003)PAAK	2	0.77846	3	*
Q943L2	6	K	Histone H2B.11	H2B	0.999248	0.000296022	147.75	AEK(0.999)K(0.001)PAEK	2	0.22747	4	*	*
A3AGM4	6	K	Histone H2B.1	H2B	0.998925	0.000699442	144.65	AEK(0.999)K(0.001)PAEK	2	0.42791	2	*	*
Q6ZBP3	6	K	Histone H2B.2	H2B	0.998925	0.000699442	144.65	AEK(0.999)K(0.001)PAEK	2	0.42791	2	*	*
Q943L2	6	K	Histone H2B.11	H2B	0.998925	0.000699442	144.65	AEK(0.999)K(0.001)PAEK	2	0.42791	4	*	*
Q9LGH4	6	K	Histone H2B.6	H2B	0.993413	0.00769142	87.258	AEK(0.993)K(0.007)PAAK	2	0.79726	1		*
A3AGM4	7	K	Histone H2B.1	H2B	0.999289	0.0130689	98.044	AEK(0.001)K(0.999)PAEK	2	1.2252	1	*	*
Q6F362	7	K	Histone H2B.9	H2B	0.968535	0.000237469	88.071	AEK(0.031)K(0.969)PAAK(0.001)KPAEEEPAAEK	3	1.2326	1	*
Q6ZBP3	7	K	Histone H2B.2	H2B	0.999993	0.000823475	98.044	K(1)PAEKKPAEEK	3	1.7613	3	*	*
Q7GBK0	7	K	Histone H2B.7	H2B	0.968535	0.0175511	73.809	AEK(0.031)K(0.969)PAAK(0.001)KPAEEEPAAEK	3	1.2326	1	*
Q943L2	7	K	Histone H2B.11	H2B	0.999289	0.000197305	113.67	AEK(0.001)K(0.999)PAEK	2	1.2252	2	*	*
A3AGM4	7	K	Histone H2B.1	H2B	0.997213	0.019567	77.662	AEK(0.003)K(0.997)PAEK	2	-0.85564	1	*	*
Q6ZBP3	7	K	Histone H2B.2	H2B	0.999982	0.000379848	97.957	K(1)PAEKKPAEEK	3	-0.37194	2	*	*
Q943L2	7	K	Histone H2B.11	H2B	0.997213	0.00887901	97.073	AEK(0.003)K(0.997)PAEK	2	-0.85564	2	*	*
Q9LGH4	7	K	Histone H2B.6	H2B	0.990597	0.0204779	76.605	AEK(0.009)K(0.991)PAAK	2	0.11005	1		*
Q6F362	11	K	Histone H2B.9	H2B	0.902084	3.42192e-08	133.23	K(0.003)PAAK(0.902)K(0.095)PAEEEPAAEK	2	-1.38	4	*
Q6ZBP3	11	K	Histone H2B.2	H2B	0.991525	5.59668e-07	125.67	AEKKPAEK(0.992)K(0.008)PAEEK	3	-0.49368	5	*	*
Q7GBK0	11	K	Histone H2B.7	H2B	0.902084	3.42192e-08	133.23	K(0.003)PAAK(0.902)K(0.095)PAEEEPAAEK	2	-1.38	4	*
Q943L2	11	K	Histone H2B.11	H2B	0.998567	7.86349e-06	163.93	KPAEK(0.999)K(0.001)PVEEK	2	0.91217	2	*	*
Q6ZBP3	11	K	Histone H2B.2	H2B	0.999343	3.66524e-17	210.31	KPAEK(0.999)K(0.001)PAEEK	2	2.0818	4	*	*
Q943L2	11	K	Histone H2B.11	H2B	0.9934	0.000341279	96.756	K(0.003)PAEK(0.993)K(0.004)PVEEK	3	1.0005	5	*	*
Q9LGH4	11	K	Histone H2B.6	H2B	0.977543	3.83392e-09	140.77	K(0.009)PAAK(0.978)K(0.013)PAEEEPAAEK	3	-0.26406	8		*
Q6F362	12	K	Histone H2B.9	H2B	0.865019	0.000813818	73.252	AEK(0.003)K(0.014)PAAK(0.118)K(0.865)PAEEEPAAEK	3	-0.56972	2	*	*
Q7GBK0	12	K	Histone H2B.7	H2B	0.865019	0.000813818	73.252	AEK(0.003)K(0.014)PAAK(0.118)K(0.865)PAEEEPAAEK	3	-0.56972	2	*
Q9LGI2	12	K	Histone H2B.10	H2B	0.865019	0.000813818	73.252	AEK(0.003)K(0.014)PAAK(0.118)K(0.865)PAEEEPAAEK	3	-0.56972	2	*	*
Q6F362	12	K	Histone H2B.9	H2B	1	4.4434e-06	119.62	K(1)PAEEEPAAEK	2	0.66483	3	*	*
Q6ZBP3	12	K	Histone H2B.2	H2B	0.90036	0.0200068	86.772	AEKK(0.011)PAEK(0.088)K(0.9)PAEEK	3	-0.82611	1		*
Q9LGH4	12	K	Histone H2B.6	H2B	1	4.4434e-06	119.62	K(1)PAEEEPAAEK	2	0.66483	3		*
Q9LGI2	12	K	Histone H2B.10	H2B	1	4.4434e-06	119.62	K(1)PAEEEPAAEK	2	0.66483	3	*	*
Q6ZBP3	17	K	Histone H2B.2	H2B	1	2.68034e-08	133.86	PAEEK(1)AGEK	2	0.45034	6	*	*
Q943L2	17	K	Histone H2B.11	H2B	1	4.79058e-06	119.22	KPVEEK(1)AEK	3	-0.97197	4	*	*
Q6ZBP3	17	K	Histone H2B.2	H2B	1	3.20014e-09	143.43	PAEEK(1)AGEK	2	1.0932	5	*	*
Q943L2	17	K	Histone H2B.11	H2B	1	0.000117055	144.55	KPVEEK(1)AEK	2	-0.24673	7	*	*
A3AGM4	19	K	Histone H2B.1	H2B	1	1.88306e-08	172.58	KPAAGEEK(1)SAEK	2	0.59164	4	*	*
A3AGM4	19	K	Histone H2B.1	H2B	1	2.9885e-08	172.58	KPAAGEEK(1)SAEK	2	0.27543	6	*	*
Q6ZBP3	21	K	Histone H2B.2	H2B	1	0.0125995	60	AGEK(1)APAAGK	2	-1.2241	2	*	*
Q6ZBP3	21	K	Histone H2B.2	H2B	1	0.00516341	73.9	AGEK(1)APAAGK	2	-0.17298	1	*	*
Q6F362	22	K	Histone H2B.9	H2B	1	1.99791e-11	148.52	KPAEEEPAAEK(1)APAAGK	2	0.048942	3	*	*
Q7GBK0	22	K	Histone H2B.7	H2B	1	4.96932e-24	235.35	PAEEEPAAEK(1)AEK	2	0.70522	7	*
Q9LGI2	22	K	Histone H2B.10	H2B	1	4.96932e-24	235.35	PAEEEPAAEK(1)AEK	2	0.70522	6	*	*
Q6F362	22	K	Histone H2B.9	H2B	1	9.17979e-07	127.59	KPAEEEPAAEK(1)APAAGK	2	0.20095	3	*	*
Q9LGH4	22	K	Histone H2B.6	H2B	1	1.77228e-31	246.34	PAEEEPAAEK(1)AEK	2	1.1507	7		*
Q9LGI2	22	K	Histone H2B.10	H2B	1	1.77228e-31	246.34	PAEEEPAAEK(1)AEK	2	1.1507	6	*	*
A3AGM4	23	K	Histone H2B.1	H2B	1	0.031738	44.98	SAEK(1)APAGK	2	-0.94598	1	*	*
A3AGM4	23	K	Histone H2B.1	H2B	1	0.0289599	50.034	SAEK(1)APAGK	2	-0.98311	1	*	*
Q943L2	23	K	Histone H2B.11	H2B	0.973231	0.00781174	62.271	AEK(0.002)K(0.024)PK(0.973)AEK	3	-1.7277	1		*
Q7GBK0	25	K	Histone H2B.7	H2B	1	0.00712593	78.516	AEK(1)APAGK	2	-1.4172	2	*
Q9LGI2	25	K	Histone H2B.10	H2B	1	0.0156742	65.465	AEK(1)ALAGK	2	-0.08269	1	*	*
Q9LGH4	25	K	Histone H2B.6	H2B	1	0.0051111	89.698	AEK(1)APAGK	2	-1.6383	4		*
Q9LGI2	25	K	Histone H2B.10	H2B	1	0.00916143	79.893	AEK(1)ALAGK	2	0.023877	1	*	*
Q6ZBP3	27	K	Histone H2B.2	H2B	1	0.0369533	54.787	APAAGK(1)K	2	-0.5573	1		*
A3AGM4	28	K	Histone H2B.1	H2B	0.834811	0.00762372	59.116	SAEKAPAGK(0.835)K(0.165)PK	3	1.8808	1	*
Q6F362	28	K	Histone H2B.9	H2B	0.979413	0.00517104	55.453	KPAEEEPAAEK(0.021)APAAGK(0.979)K	3	1.2758	1	*	*
Q6F362	28	K	Histone H2B.9	H2B	1	0.0369533	54.787	APAAGK(1)K	2	-0.5573	1	*	*
A3AGM4	29	K	Histone H2B.1	H2B	0.885774	0.0343412	66.073	APAGK(0.114)K(0.886)PK	2	-0.14682	1		*
Q7GBK0	30	K	Histone H2B.7	H2B	0.959229	0.0230481	87.667	AEKAPAGK(0.959)K(0.041)PK	2	-0.64497	1	*
Q9LGH4	30	K	Histone H2B.6	H2B	0.935208	0.00294804	72.289	AEKAPAGK(0.935)K(0.065)PK	2	0.26542	1		*
Q7GBK0	31	K	Histone H2B.7	H2B	0.84366	0.00406057	88.155	AEKAPAGK(0.156)K(0.844)PK	2	0.24595	2	*
A3AGM4	31	K	Histone H2B.1	H2B	0.988036	0.000847499	84.821	APAGK(0.001)K(0.011)PK(0.988)AEK	3	0.67214	2		*
Q9LGH4	31	K	Histone H2B.6	H2B	0.885774	0.0117569	74.611	APAGK(0.114)K(0.886)PK	2	-0.14682	2		*
Q943L2	32	K	Histone H2B.11	H2B	1	1.95204e-07	171.95	VPGAK(1)EGGGEK	2	-0.64328	6	*	*
Q943L2	32	K	Histone H2B.11	H2B	1	5.34959e-06	148.48	VPGAK(1)EGGGEK	2	1.3355	6	*	*
Q9LGH4	33	K	Histone H2B.6	H2B	0.988036	0.000847499	84.821	APAGK(0.001)K(0.011)PK(0.988)AEK	3	0.67214	2		*
Q6ZBP3	39	K	Histone H2B.2	H2B	1	0.000799532	134.84	RLPASK(1)GEK	3	-0.13279	5	*	*
Q6ZBP3	39	K	Histone H2B.2	H2B	1	0.00274489	98.04	RLPASK(1)GEK	3	0.013744	4	*	*
A3AGM4	40	K	Histone H2B.1	H2B	1	0.000506023	131.12	RLPASK(1)ASSK	2	1.4463	1	*	*
Q6F362	40	K	Histone H2B.9	H2B	1	0.000970933	131.52	RLPAGK(1)GEK	2	-0.99262	3	*	*
A3AGM4	40	K	Histone H2B.1	H2B	1	0.000644477	119.03	RLPASK(1)ASSK	2	1.1852	2	*	*
Q6F362	40	K	Histone H2B.9	H2B	1	0.00114499	126.39	RLPAGK(1)GEK	2	-0.14204	3	*	*
Q7GBK0	42	K	Histone H2B.7	H2B	1	0.000970933	131.52	RLPAGK(1)GEK	2	-0.99262	3	*
Q94JJ7	42	K	Histone H2B.3	H2B	1	0.00155313	115.7	RLPAGK(1)AEK	2	-0.8966	2	*	*
Q94JJ7	42	K	Histone H2B.3	H2B	1	0.0161119	67.897	LPAGK(1)AEK	2	-0.17454	1	*	*
Q9LGH4	42	K	Histone H2B.6	H2B	1	0.00114499	126.39	RLPAGK(1)GEK	2	-0.14204	3		*
Q6F362	43	K	Histone H2B.9	H2B	1	0.000877214	98.737	GEK(1)GGAGEGK	2	-1.1631	1	*	*
Q6F362	43	K	Histone H2B.9	H2B	1	0.00136502	94.584	GEK(1)GGAGEGK	2	-1.6697	2	*	*
A3AGM4	44	K	Histone H2B.1	H2B	1	0.0042671	72.29	ASSK(1)EGGAGDK	2	-1.5658	1		*
Q7GBK0	45	K	Histone H2B.7	H2B	1	1.43678e-06	140.03	GEK(1)GSGEGK	2	-0.12657	4	*
Q94JJ7	45	K	Histone H2B.3	H2B	1	0.00158261	100.02	AEK(1)GSGEGR	2	-0.026833	3	*	*
Q9LGI2	45	K	Histone H2B.10	H2B	1	0.0309232	45.598	AEK(1)SSGEGK	2	0.8956	1	*	*
Q94JJ7	45	K	Histone H2B.3	H2B	1	0.00209372	98.048	AEK(1)GSGEGR	2	0.01801	1	*	*
Q9LGH4	45	K	Histone H2B.6	H2B	1	0.00065743	98.421	GEK(1)GSGEGK	2	1.3934	5		*
Q9LGI2	45	K	Histone H2B.10	H2B	1	0.00126339	106.88	AEK(1)SSGEGK	2	-0.57191	1	*	*
Q7GBK0	60	K	Histone H2B.7	H2B	1	0.0169755	138.54	K(1)SVETYK	2	1.7337	1	*
Q9LGH4	60	K	Histone H2B.6	H2B	1	0.0190219	124.98	K(1)SVETYK	2	1.8962	1		*
Q7GBK0	66	K	Histone H2B.7	H2B	1	1.22861e-05	146.36	KSVETYK(1)IYIFK	3	0.55399	1	*
Q9LGH4	66	K	Histone H2B.6	H2B	1	4.34668e-14	205.87	SVETYK(1)IYIFK	3	0.70748	5		*
Q7GBK0	71	K	Histone H2B.7	H2B	1	0.00424428	86.794	IYIFK(1)VLK	2	1.0293	2	*
Q9LGH4	71	K	Histone H2B.6	H2B	1	0.00678392	85.212	IYIFK(1)VLK	2	2.6742	1		*
Q7GBK0	74	K	Histone H2B.7	H2B	1	2.82075e-11	187.37	VLK(1)QVHPDIGISSK	2	0.27411	3	*
Q9LGH4	74	K	Histone H2B.6	H2B	1	8.0798e-12	176.23	VLK(1)QVHPDIGISSK	2	0.1258	4		*
Q6ZBP3	104	K	Histone H2B.2	H2B	1	0.000670113	109.66	LAGEAAK(1)LAR	2	0.70823	2	*	*
Q6ZBP3	104	K	Histone H2B.2	H2B	1	8.45194e-05	142.43	LAGEAAK(1)LAR	2	-0.59119	2	*	*
Q7GBK0	107	K	Histone H2B.7	H2B	1	0.000466263	128.27	LAGESAK(1)LAR	2	-0.36694	2	*
Q9LGH4	107	K	Histone H2B.6	H2B	1	0.000612433	107.79	LAAEAAK(1)LAR	3	-0.97514	4		*
Q9LGH8	107	K	Histone H2B.8	H2B	1	0.000629488	106.2	LAGESAK(1)LAR	2	-0.84308	1		*
Q94JE1	109	K	Histone H2B.5	H2B	1	0.000397045	123.35	LAAEAAK(1)LAR	3	-0.92256	3	*
Q7GBK0	113	K	Histone H2B.7	H2B	0.998618	0.0010169	94.66	YNK(0.999)K(0.001)PTITSR	2	-0.30498	3	*
Q9LGH4	113	K	Histone H2B.6	H2B	0.999336	0.000758806	97.633	YNK(0.999)K(0.001)PTITSR	2	-0.31561	3		*
Q7GBK0	136	K	Histone H2B.7	H2B	1	7.04908e-07	121.01	LVLPGELAK(1)HAVSEGTK	3	1.8414	3	*
Q9LGH4	136	K	Histone H2B.6	H2B	1	0.000433032	75.548	LVLPGELAK(1)HAVSEGTK	3	-0.70479	2		*
Q7GBK0	144	K	Histone H2B.7	H2B	1	1.86285e-10	191.53	HAVSEGTK(1)AVTK	3	0.89563	4	*
Q9LGH4	144	K	Histone H2B.6	H2B	1	7.72132e-05	111.31	HAVSEGTK(1)AVTK	3	1.3465	4		*
A3AGM4	147	K	Histone H2B.1	H2B	1	0.0379324	45.738	AVTK(1)FTSN	2	-0.1287	1	*	*
A3AGM4	147	K	Histone H2B.1	H2B	1	0.0230928	60.478	AVTK(1)FTSN	2	0.79514	1	*	*
Q9LGH4	148	K	Histone H2B.6	H2B	1	0.0367812	48.561	AVTK(1)FTSS	2	0.81591	1		*
Q0JCT1	9	K	Histone H3.3	H3	1	0.00681913	108.57	K(1)STGGKAPR	2	0.82282	2	*	*
Q0JCT1	9	K	Histone H3.3	H3	1	0.00224756	119.75	K(1)STGGKAPR	2	1.5533	1	*	*
Q0JCT1	14	K	Histone H3.3	H3	0.999905	0.0311756	70.439	KSTGGK(1)APR	2	0.6408	1	*
Q0JCT1	23	K	Histone H3.3	H3	1	0.00141872	144.77	QLATK(1)AAR	2	1.6816	5	*	*
Q0JCT1	23	K	Histone H3.3	H3	1	0.000794141	116.52	QLATK(1)AAR	2	1.8007	6	*	*
Q0JCT1	27	K	Histone H3.3	H3	1	0.000141149	101.3	K(1)SAPTTGGVKKPHR	3	0.12046	1	*
Q0JCT1	56	K	Histone H3.3	H3	1	3.48429e-06	159.44	YQK(1)STELLIR	3	0.82525	4	*	*
Q0JCT1	56	K	Histone H3.3	H3	1	0.000248797	132.88	YQK(1)STELLIR	3	1.1503	2	*	*
Q0JCT1	79	K	Histone H3.3	H3	1	6.01752e-05	141.08	EIAQDFK(1)TDLR	2	-0.78514	4	*	*
Q0JCT1	79	K	Histone H3.3	H3	1	1.31155e-05	147.62	EIAQDFK(1)TDLR	2	-0.34767	3	*	*
Q0JCT1	122	K	Histone H3.3	H3	1	1.55175e-05	136.96	VTIMPK(1)DIQLAR	3	-0.64666	6	*	*
Q0JCT1	122	K	Histone H3.3	H3	1	1.88887e-05	125.97	VTIMPK(1)DIQLAR	3	-1.048	8	*	*
Q7XUC9	8	K	Histone H4	H4	0.999939	0.00372996	89.189	GGK(1)GLGKGGAKR	2	0.49229	2		*
Q7XUC9	12	K	Histone H4	H4	0.999998	0.00631044	104.06	GLGK(1)GGAKR	2	0.69244	2	*	*
Q7XUC9	12	K	Histone H4	H4	0.999996	0.00640246	93.143	GLGK(1)GGAKR	2	1.1035	2	*	*
Q7XUC9	16	K	Histone H4	H4	0.999964	0.00858725	88.819	GLGKGGAK(1)R	2	0.59603	2	*	*
Q7XUC9	16	K	Histone H4	H4	0.999999	0.00363316	100.02	GLGKGGAK(1)R	2	-0.16629	1	*	*
Q7XUC9	31	K	Histone H4	H4	1	7.35892e-05	111.79	DNIQGITK(1)PAIR	3	2.1469	2	*	*
Q7XUC9	31	K	Histone H4	H4	1	6.82389e-05	113.99	DNIQGITK(1)PAIR	3	-0.51554	2	*	*
Q7XUC9	79	K	Histone H4	H4	1	5.13901e-05	103.13	K(1)TVTAMDVVYALK	2	2.2314	2	*	*
Q7XUC9	79	K	Histone H4	H4	1	0.000157982	110.44	K(1)TVTAMDVVYALK	2	1.4088	2	*	*
Q7XUC9	91	K	Histone H4	H4	1	3.11855e-07	150.51	TVTAMDVVYALK(1)R	3	-1.1022	4	*	*
Q7XUC9	91	K	Histone H4	H4	1	1.55873e-07	156.14	TVTAMDVVYALK(1)R	2	-0.47164	6	*	*

## Sheet: Crontonyl exp.1 rep.1
Protein accession	Position	Amino acid	Protein description	Gene name	Localization probability	PEP	Score	Modified sequence	Charge	Mass error [ppm]	MS/MS Count
Q2QS71	125	K	Probable histone H2A.7	H2A	1	1.76811e-05	106.58	AGSSK(1)ASHADDDDN	2	0.04537	1
Q6L500	5	K	Probable histone H2A.4	H2A	1	0.0043683	71.451	MEVGAK(1)VPK	2	-0.024527	1
Q6ZL42	5	K	Probable histone H2A.2	H2A	1	0.00410734	72.582	GK(1)AIGSGAAK	2	0.64199	1
Q6ZL42	21	K	Probable histone H2A.2	H2A	1	2.98657e-05	132.5	SSK(1)AGLQFPVGR	3	0.31424	2
Q6ZL42	126	K	Probable histone H2A.2	H2A	1	9.00775e-05	101.43	AGGSAK(1)AAAGDDDN	2	0.43394	2
Q6ZL42	39	K	Probable histone H2A.2	H2A	1	0.00803957	76.774	AGK(1)YAER	2	-0.23277	1
Q6ZL42	120	K	Probable histone H2A.2	H2A	0.994073	4.07095e-09	144.4	K(0.994)AGGSAK(0.006)AAAGDDDN	2	-0.97444	2
Q6ZL42	13	K	Probable histone H2A.2	H2A	0.999998	0.0110708	58.172	GKAIGSGAAK(1)K	2	-1.3671	1
Q6ZL43	119	K	Probable histone H2A.1	H2A	1	0.000129824	92.098	LLGGATIASGGVMPNIHQHLLPK(1)K	4	-0.74912	1
Q6ZL43	120	K	Probable histone H2A.1	H2A	0.958996	2.83558e-13	190.11	K(0.959)AGSSK(0.041)ASTVDDDDN	2	-0.02472	1
Q6ZL43	125	K	Probable histone H2A.1	H2A	1	0.00603384	62.68	AGSSK(1)ASTVDDDDN	2	-0.78742	1
Q6ZL43	13	K	Probable histone H2A.1	H2A	1	0.0100692	78.342	GKAIGAGAAK(1)K	2	-0.38013	1
Q75L11	21	K	Probable histone H2A.6	H2A	0.99998	0.0315199	64.757	KLGGPK(1)K	2	1.7422	1
Q84NJ4	5	K	Probable histone H2A.3	H2A	1	0.00233784	82.261	GK(1)AIGSSAAK	2	0.39823	1
Q84NJ4	126	K	Probable histone H2A.3	H2A	1	0.00175093	73.881	AGSSAK(1)AAAADDE	2	1.3901	1
Q84NJ4	13	K	Probable histone H2A.3	H2A	1	0.00248095	93.839	GKAIGSSAAK(1)K	2	0.42031	1
Q94E96	136	K	Probable histone H2A.5	H2A	1	0.000652946	107.45	TAEK(1)AAAAGK	2	-0.85939	4
Q94E96	10	K	Probable histone H2A.5	H2A	1	5.07105e-05	134.99	MDAAGAGAGGK(1)LK	2	-0.87049	2
Q94E96	33	K	Probable histone H2A.5	H2A	1	4.04085e-05	125.72	SVK(1)AGLQFPVGR	3	1.0966	3
Q94E96	12	K	Probable histone H2A.5	H2A	0.985909	6.43772e-06	143.98	MDAAGAGAGGK(0.014)LK(0.986)K	2	-1.5471	1
Q94E96	145	K	Probable histone H2A.5	H2A	0.991485	0.0115161	71.558	AAAAGK(0.009)EAK(0.991)SPK	2	-0.44329	1
Q94E96	142	K	Probable histone H2A.5	H2A	1	0.0039233	80.231	AAAAGK(1)EAK	2	-1.2573	2
Q84MP7	21	K	Probable histone H2A variant 3	H2AV	0.997022	0.00080383	117.86	TTAAK(0.003)SAEK(0.997)DK	2	0.022696	1
Q84MP7	127	K	Probable histone H2A variant 3	H2AV	1	0.000151634	85.046	GTIAGGGVIPHIHK(1)SLINK	4	0.34045	2
Q84MP7	17	K	Probable histone H2A variant 3	H2AV	1	0.00168503	96.143	TTAAK(1)SAEK	2	1.1268	2
Q84MP7	6	K	Probable histone H2A variant 3	H2AV	1	0.00629141	81.632	GGK(1)GLLAAKTTAAK	2	0.50097	1
Q84MP7	12	K	Probable histone H2A variant 3	H2AV	1	0.000731252	88.596	GLLAAK(1)TTAAK	2	0.73886	1
Q84MP7	132	K	Probable histone H2A variant 3	H2AV	1	0.00810783	75.696	SLINK(1)SSK	2	0.044694	1
Q8H7Y8	17	K	Probable histone H2A variant 1	H2AV	1	0.00452663	77.662	TTAAK(1)SADK	2	0.26046	1
Q8S857	24	K	Probable histone H2A variant 2	H2AV	0.883207	0.00641197	74.841	AAADK(0.117)DK(0.883)DR	2	-1.2184	2
Q8S857	17	K	Probable histone H2A variant 2	H2AV	1	0.00229512	82.494	TTAAK(1)AAADK	2	0.26336	1
Q8S857	22	K	Probable histone H2A variant 2	H2AV	0.950868	0.00604169	74.841	AAADK(0.951)DK(0.049)DR	2	-0.16033	3
Q8S857	134	K	Probable histone H2A variant 2	H2AV	1	0.00346701	89.355	SLINK(1)TAK	2	0.74927	1
A3AGM4	7	K	Histone H2B.1	H2B	0.999289	0.0130689	98.044	AEK(0.001)K(0.999)PAEK	2	1.2252	1
A3AGM4	23	K	Histone H2B.1	H2B	1	0.031738	44.98	SAEK(1)APAGK	2	-0.94598	1
A3AGM4	6	K	Histone H2B.1	H2B	0.999248	0.000296022	147.75	AEK(0.999)K(0.001)PAEK	2	0.22747	2
A3AGM4	147	K	Histone H2B.1	H2B	1	0.0379324	45.738	AVTK(1)FTSN	2	-0.1287	1
A3AGM4	28	K	Histone H2B.1	H2B	0.834811	0.00762372	59.116	SAEKAPAGK(0.835)K(0.165)PK	3	1.8808	1
A3AGM4	40	K	Histone H2B.1	H2B	1	0.000506023	131.12	RLPASK(1)ASSK	2	1.4463	1
A3AGM4	19	K	Histone H2B.1	H2B	1	1.88306e-08	172.58	KPAAGEEK(1)SAEK	2	0.59164	4
Q6F362	7	K	Histone H2B.9	H2B	0.968535	0.000237469	88.071	AEK(0.031)K(0.969)PAAK(0.001)KPAEEEPAAEK	3	1.2326	1
Q6F362	22	K	Histone H2B.9	H2B	1	1.99791e-11	148.52	KPAEEEPAAEK(1)APAAGK	2	0.048942	3
Q6F362	12	K	Histone H2B.9	H2B	0.865019	0.000813818	73.252	AEK(0.003)K(0.014)PAAK(0.118)K(0.865)PAEEEPAAEK	3	-0.56972	2
Q6F362	40	K	Histone H2B.9	H2B	1	0.000970933	131.52	RLPAGK(1)GEK	2	-0.99262	3
Q6F362	28	K	Histone H2B.9	H2B	0.979413	0.00517104	55.453	KPAEEEPAAEK(0.021)APAAGK(0.979)K	3	1.2758	1
Q6F362	43	K	Histone H2B.9	H2B	1	0.000877214	98.737	GEK(1)GGAGEGK	2	-1.1631	1
Q6F362	11	K	Histone H2B.9	H2B	0.902084	3.42192e-08	133.23	K(0.003)PAAK(0.902)K(0.095)PAEEEPAAEK	2	-1.38	4
Q6ZBP3	21	K	Histone H2B.2	H2B	1	0.0125995	60	AGEK(1)APAAGK	2	-1.2241	2
Q6ZBP3	7	K	Histone H2B.2	H2B	0.999993	0.000823475	98.044	K(1)PAEKKPAEEK	3	1.7613	3
Q6ZBP3	17	K	Histone H2B.2	H2B	1	2.68034e-08	133.86	PAEEK(1)AGEK	2	0.45034	6
Q6ZBP3	39	K	Histone H2B.2	H2B	1	0.000799532	134.84	RLPASK(1)GEK	3	-0.13279	5
Q6ZBP3	6	K	Histone H2B.2	H2B	0.999248	0.000296022	147.75	AEK(0.999)K(0.001)PAEK	2	0.22747	2
Q6ZBP3	104	K	Histone H2B.2	H2B	1	0.000670113	109.66	LAGEAAK(1)LAR	2	0.70823	2
Q6ZBP3	11	K	Histone H2B.2	H2B	0.991525	5.59668e-07	125.67	AEKKPAEK(0.992)K(0.008)PAEEK	3	-0.49368	5
Q7GBK0	31	K	Histone H2B.7	H2B	0.84366	0.00406057	88.155	AEKAPAGK(0.156)K(0.844)PK	2	0.24595	2
Q7GBK0	66	K	Histone H2B.7	H2B	1	1.22861e-05	146.36	KSVETYK(1)IYIFK	3	0.55399	1
Q7GBK0	6	K	Histone H2B.7	H2B	0.996592	0.00356944	98.233	AEK(0.997)K(0.003)PAAK	2	0.77846	3
Q7GBK0	25	K	Histone H2B.7	H2B	1	0.00712593	78.516	AEK(1)APAGK	2	-1.4172	2
Q7GBK0	45	K	Histone H2B.7	H2B	1	1.43678e-06	140.03	GEK(1)GSGEGK	2	-0.12657	4
Q7GBK0	71	K	Histone H2B.7	H2B	1	0.00424428	86.794	IYIFK(1)VLK	2	1.0293	2
Q7GBK0	22	K	Histone H2B.7	H2B	1	4.96932e-24	235.35	PAEEEPAAEK(1)AEK	2	0.70522	7
Q7GBK0	12	K	Histone H2B.7	H2B	0.865019	0.000813818	73.252	AEK(0.003)K(0.014)PAAK(0.118)K(0.865)PAEEEPAAEK	3	-0.56972	2
Q7GBK0	74	K	Histone H2B.7	H2B	1	2.82075e-11	187.37	VLK(1)QVHPDIGISSK	2	0.27411	3
Q7GBK0	60	K	Histone H2B.7	H2B	1	0.0169755	138.54	K(1)SVETYK	2	1.7337	1
Q7GBK0	107	K	Histone H2B.7	H2B	1	0.000466263	128.27	LAGESAK(1)LAR	2	-0.36694	2
Q7GBK0	113	K	Histone H2B.7	H2B	0.998618	0.0010169	94.66	YNK(0.999)K(0.001)PTITSR	2	-0.30498	3
Q7GBK0	11	K	Histone H2B.7	H2B	0.902084	3.42192e-08	133.23	K(0.003)PAAK(0.902)K(0.095)PAEEEPAAEK	2	-1.38	4
Q7GBK0	136	K	Histone H2B.7	H2B	1	7.04908e-07	121.01	LVLPGELAK(1)HAVSEGTK	3	1.8414	3
Q7GBK0	7	K	Histone H2B.7	H2B	0.968535	0.0175511	73.809	AEK(0.031)K(0.969)PAAK(0.001)KPAEEEPAAEK	3	1.2326	1
Q7GBK0	144	K	Histone H2B.7	H2B	1	1.86285e-10	191.53	HAVSEGTK(1)AVTK	3	0.89563	4
Q7GBK0	42	K	Histone H2B.7	H2B	1	0.000970933	131.52	RLPAGK(1)GEK	2	-0.99262	3
Q7GBK0	30	K	Histone H2B.7	H2B	0.959229	0.0230481	87.667	AEKAPAGK(0.959)K(0.041)PK	2	-0.64497	1
Q943L2	7	K	Histone H2B.11	H2B	0.999289	0.000197305	113.67	AEK(0.001)K(0.999)PAEK	2	1.2252	2
Q943L2	32	K	Histone H2B.11	H2B	1	1.95204e-07	171.95	VPGAK(1)EGGGEK	2	-0.64328	6
Q943L2	17	K	Histone H2B.11	H2B	1	4.79058e-06	119.22	KPVEEK(1)AEK	3	-0.97197	4
Q943L2	6	K	Histone H2B.11	H2B	0.999248	0.000296022	147.75	AEK(0.999)K(0.001)PAEK	2	0.22747	4
Q943L2	11	K	Histone H2B.11	H2B	0.998567	7.86349e-06	163.93	KPAEK(0.999)K(0.001)PVEEK	2	0.91217	2
Q94JE1	109	K	Histone H2B.5	H2B	1	0.000397045	123.35	LAAEAAK(1)LAR	3	-0.92256	3
Q94JJ7	45	K	Histone H2B.3	H2B	1	0.00158261	100.02	AEK(1)GSGEGR	2	-0.026833	3
Q94JJ7	42	K	Histone H2B.3	H2B	1	0.00155313	115.7	RLPAGK(1)AEK	2	-0.8966	2
Q9LGI2	45	K	Histone H2B.10	H2B	1	0.0309232	45.598	AEK(1)SSGEGK	2	0.8956	1
Q9LGI2	22	K	Histone H2B.10	H2B	1	4.96932e-24	235.35	PAEEEPAAEK(1)AEK	2	0.70522	6
Q9LGI2	12	K	Histone H2B.10	H2B	0.865019	0.000813818	73.252	AEK(0.003)K(0.014)PAAK(0.118)K(0.865)PAEEEPAAEK	3	-0.56972	2
Q9LGI2	25	K	Histone H2B.10	H2B	1	0.0156742	65.465	AEK(1)ALAGK	2	-0.08269	1
Q0JCT1	122	K	Histone H3.3	H3	1	1.55175e-05	136.96	VTIMPK(1)DIQLAR	3	-0.64666	6
Q0JCT1	27	K	Histone H3.3	H3	1	0.000141149	101.3	K(1)SAPTTGGVKKPHR	3	0.12046	1
Q0JCT1	56	K	Histone H3.3	H3	1	3.48429e-06	159.44	YQK(1)STELLIR	3	0.82525	4
Q0JCT1	23	K	Histone H3.3	H3	1	0.00141872	144.77	QLATK(1)AAR	2	1.6816	5
Q0JCT1	9	K	Histone H3.3	H3	1	0.00681913	108.57	K(1)STGGKAPR	2	0.82282	2
Q0JCT1	79	K	Histone H3.3	H3	1	6.01752e-05	141.08	EIAQDFK(1)TDLR	2	-0.78514	4
Q0JCT1	14	K	Histone H3.3	H3	0.999905	0.0311756	70.439	KSTGGK(1)APR	2	0.6408	1
Q7XUC9	91	K	Histone H4	H4	1	3.11855e-07	150.51	TVTAMDVVYALK(1)R	3	-1.1022	4
Q7XUC9	31	K	Histone H4	H4	1	7.35892e-05	111.79	DNIQGITK(1)PAIR	3	2.1469	2
Q7XUC9	79	K	Histone H4	H4	1	5.13901e-05	103.13	K(1)TVTAMDVVYALK	2	2.2314	2
Q7XUC9	12	K	Histone H4	H4	0.999998	0.00631044	104.06	GLGK(1)GGAKR	2	0.69244	2
Q7XUC9	16	K	Histone H4	H4	0.999964	0.00858725	88.819	GLGKGGAK(1)R	2	0.59603	2

## Sheet: Crontonyl exp.1 rep.2
Protein accession	Position	Amino acid	Protein description	Gene name	Localization probability	PEP	Score	Modified sequence	Charge	Mass error [ppm]	MS/MS Count
Q2QS71	125	K	Probable histone H2A.7	H2A	1	0.00205164	75.316	AGSSK(1)ASHADDDDN	2	0.2334	1
Q6L500	5	K	Probable histone H2A.4	H2A	1	0.00495559	71.614	MEVGAK(1)VPK	2	0.62045	2
Q6ZL42	5	K	Probable histone H2A.2	H2A	1	0.00558513	72.096	GK(1)AIGSGAAK	2	0.70559	1
Q6ZL42	126	K	Probable histone H2A.2	H2A	1	0.000322076	98.974	AGGSAK(1)AAAGDDDN	2	0.57732	2
Q6ZL42	13	K	Probable histone H2A.2	H2A	1	0.00812408	72.531	GKAIGSGAAK(1)K	2	-0.69032	1
Q6ZL43	21	K	Probable histone H2A.1	H2A	1	3.95158e-05	122.55	SSK(1)AGLQFPVGR	3	1.3811	2
Q6ZL43	119	K	Probable histone H2A.1	H2A	1	0.00270331	77.221	LLGGATIASGGVMPNIHQHLLPK(1)K	4	-1.6923	1
Q6ZL43	120	K	Probable histone H2A.1	H2A	0.96039	5.39173e-14	186.42	K(0.96)AGSSK(0.04)ASTVDDDDN	2	0.074751	1
Q6ZL43	125	K	Probable histone H2A.1	H2A	1	0.00900939	58.972	AGSSK(1)ASTVDDDDN	2	-1.3973	1
Q6ZL43	13	K	Probable histone H2A.1	H2A	1	0.00530062	79.659	AIGAGAAK(1)K	2	0.66235	2
Q84NJ4	5	K	Probable histone H2A.3	H2A	1	0.00550607	72.434	GK(1)AIGSSAAK	2	0.94662	1
Q84NJ4	126	K	Probable histone H2A.3	H2A	1	0.00231416	75.088	AGSSAK(1)AAAADDE	2	1.0965	1
Q84NJ4	13	K	Probable histone H2A.3	H2A	1	0.000530403	103.91	GKAIGSSAAK(1)K	2	1.7795	1
Q94E96	10	K	Probable histone H2A.5	H2A	1	1.41064e-06	123.95	MDAAGAGAGGK(1)LK	2	-2.0238	3
Q94E96	145	K	Probable histone H2A.5	H2A	0.976942	0.0034386	81.565	AAAAGK(0.023)EAK(0.977)SPK	2	-0.85394	1
Q94E96	142	K	Probable histone H2A.5	H2A	1	0.00782089	72.325	AAAAGK(1)EAK	2	-0.55421	1
Q94E96	136	K	Probable histone H2A.5	H2A	1	0.000597744	109.16	TAEK(1)AAAAGK	2	-0.66123	3
Q94E96	33	K	Probable histone H2A.5	H2A	1	1.81473e-05	134.3	SVK(1)AGLQFPVGR	3	-0.73234	3
Q94E96	153	K	Probable histone H2A.5	H2A	1	0.015481	79.116	AAGK(1)SPK	2	-0.5812	1
Q94E96	156	K	Probable histone H2A.5	H2A	0.998676	0.0213969	65.157	AAGK(0.001)SPK(0.999)K	2	0.85517	1
Q94E96	12	K	Probable histone H2A.5	H2A	0.983469	6.64903e-05	124.07	MDAAGAGAGGK(0.017)LK(0.983)K	2	1.4223	1
Q84MP7	21	K	Probable histone H2AV	H2AV	0.999038	3.64222e-05	143	TTAAK(0.001)SAEK(0.999)DK	2	0.0051314	1
Q84MP7	17	K	Probable histone H2AV	H2AV	1	0.00223956	96.665	TTAAK(1)SAEK	2	0.95693	2
Q84MP7	132	K	Probable histone H2AV	H2AV	1	0.0220536	61.582	SLINK(1)SSK	2	0.21315	1
Q8H7Y8	17	K	Probable histone H2AV	H2AV	1	0.00268447	92.445	TTAAK(1)SADK	2	-0.47372	2
Q8H7Y8	133	K	Probable histone H2AV	H2AV	1	0.0115779	74.486	SLINK(1)TSK	2	-1.6553	1
Q8S857	129	K	Probable histone H2AV	H2AV	1	1.17378e-05	101.92	GTIAGGGVIPHIHK(1)SLINK	3	-1.9263	2
Q8S857	17	K	Probable histone H2AV	H2AV	1	2.15004e-05	115.91	TTAAK(1)AAADK	2	0.77567	4
Q8S857	6	K	Probable histone H2AV	H2AV	1	0.00102503	90.707	GGK(1)GLLAAKTTAAK	2	1.3285	2
Q8S857	12	K	Probable histone H2AV	H2AV	1	0.00205548	83.045	GLLAAK(1)TTAAK	2	0.51826	2
Q8S857	22	K	Probable histone H2AV	H2AV	1	0.00192319	96.342	AAADK(1)DK	2	-0.118	3
Q8S857	134	K	Probable histone H2AV	H2AV	1	0.00214492	107.69	SLINK(1)TAK	2	-0.7737	1
A3AGM4	31	K	Histone H2B.1	H2B	0.988036	0.000847499	84.821	APAGK(0.001)K(0.011)PK(0.988)AEK	3	0.67214	2
A3AGM4	6	K	Histone H2B.1	H2B	0.998925	0.000699442	144.65	AEK(0.999)K(0.001)PAEK	2	0.42791	2
A3AGM4	40	K	Histone H2B.1	H2B	1	0.000644477	119.03	RLPASK(1)ASSK	2	1.1852	2
A3AGM4	19	K	Histone H2B.1	H2B	1	2.9885e-08	172.58	KPAAGEEK(1)SAEK	2	0.27543	6
A3AGM4	7	K	Histone H2B.1	H2B	0.997213	0.019567	77.662	AEK(0.003)K(0.997)PAEK	2	-0.85564	1
A3AGM4	29	K	Histone H2B.1	H2B	0.885774	0.0343412	66.073	APAGK(0.114)K(0.886)PK	2	-0.14682	1
A3AGM4	44	K	Histone H2B.1	H2B	1	0.0042671	72.29	ASSK(1)EGGAGDK	2	-1.5658	1
A3AGM4	23	K	Histone H2B.1	H2B	1	0.0289599	50.034	SAEK(1)APAGK	2	-0.98311	1
A3AGM4	147	K	Histone H2B.1	H2B	1	0.0230928	60.478	AVTK(1)FTSN	2	0.79514	1
Q6F362	22	K	Histone H2B.9	H2B	1	9.17979e-07	127.59	KPAEEEPAAEK(1)APAAGK	2	0.20095	3
Q6F362	12	K	Histone H2B.9	H2B	1	4.4434e-06	119.62	K(1)PAEEEPAAEK	2	0.66483	3
Q6F362	40	K	Histone H2B.9	H2B	1	0.00114499	126.39	RLPAGK(1)GEK	2	-0.14204	3
Q6F362	43	K	Histone H2B.9	H2B	1	0.00136502	94.584	GEK(1)GGAGEGK	2	-1.6697	2
Q6F362	28	K	Histone H2B.9	H2B	1	0.0369533	54.787	APAAGK(1)K	2	-0.5573	1
Q6ZBP3	27	K	Histone H2B.2	H2B	1	0.0369533	54.787	APAAGK(1)K	2	-0.5573	1
Q6ZBP3	39	K	Histone H2B.2	H2B	1	0.00274489	98.04	RLPASK(1)GEK	3	0.013744	4
Q6ZBP3	6	K	Histone H2B.2	H2B	0.998925	0.000699442	144.65	AEK(0.999)K(0.001)PAEK	2	0.42791	2
Q6ZBP3	11	K	Histone H2B.2	H2B	0.999343	3.66524e-17	210.31	KPAEK(0.999)K(0.001)PAEEK	2	2.0818	4
Q6ZBP3	7	K	Histone H2B.2	H2B	0.999982	0.000379848	97.957	K(1)PAEKKPAEEK	3	-0.37194	2
Q6ZBP3	21	K	Histone H2B.2	H2B	1	0.00516341	73.9	AGEK(1)APAAGK	2	-0.17298	1
Q6ZBP3	17	K	Histone H2B.2	H2B	1	3.20014e-09	143.43	PAEEK(1)AGEK	2	1.0932	5
Q6ZBP3	12	K	Histone H2B.2	H2B	0.90036	0.0200068	86.772	AEKK(0.011)PAEK(0.088)K(0.9)PAEEK	3	-0.82611	1
Q6ZBP3	104	K	Histone H2B.2	H2B	1	8.45194e-05	142.43	LAGEAAK(1)LAR	2	-0.59119	2
Q943L2	7	K	Histone H2B.11	H2B	0.997213	0.00887901	97.073	AEK(0.003)K(0.997)PAEK	2	-0.85564	2
Q943L2	32	K	Histone H2B.11	H2B	1	5.34959e-06	148.48	VPGAK(1)EGGGEK	2	1.3355	6
Q943L2	17	K	Histone H2B.11	H2B	1	0.000117055	144.55	KPVEEK(1)AEK	2	-0.24673	7
Q943L2	23	K	Histone H2B.11	H2B	0.973231	0.00781174	62.271	AEK(0.002)K(0.024)PK(0.973)AEK	3	-1.7277	1
Q943L2	6	K	Histone H2B.11	H2B	0.998925	0.000699442	144.65	AEK(0.999)K(0.001)PAEK	2	0.42791	4
Q943L2	11	K	Histone H2B.11	H2B	0.9934	0.000341279	96.756	K(0.003)PAEK(0.993)K(0.004)PVEEK	3	1.0005	5
Q94JJ7	45	K	Histone H2B.3	H2B	1	0.00209372	98.048	AEK(1)GSGEGR	2	0.01801	1
Q94JJ7	42	K	Histone H2B.3	H2B	1	0.0161119	67.897	LPAGK(1)AEK	2	-0.17454	1
Q9LGH4	31	K	Histone H2B.6	H2B	0.885774	0.0117569	74.611	APAGK(0.114)K(0.886)PK	2	-0.14682	2
Q9LGH4	66	K	Histone H2B.6	H2B	1	4.34668e-14	205.87	SVETYK(1)IYIFK	3	0.70748	5
Q9LGH4	6	K	Histone H2B.6	H2B	0.993413	0.00769142	87.258	AEK(0.993)K(0.007)PAAK	2	0.79726	1
Q9LGH4	25	K	Histone H2B.6	H2B	1	0.0051111	89.698	AEK(1)APAGK	2	-1.6383	4
Q9LGH4	45	K	Histone H2B.6	H2B	1	0.00065743	98.421	GEK(1)GSGEGK	2	1.3934	5
Q9LGH4	71	K	Histone H2B.6	H2B	1	0.00678392	85.212	IYIFK(1)VLK	2	2.6742	1
Q9LGH4	22	K	Histone H2B.6	H2B	1	1.77228e-31	246.34	PAEEEPAAEK(1)AEK	2	1.1507	7
Q9LGH4	12	K	Histone H2B.6	H2B	1	4.4434e-06	119.62	K(1)PAEEEPAAEK	2	0.66483	3
Q9LGH4	148	K	Histone H2B.6	H2B	1	0.0367812	48.561	AVTK(1)FTSS	2	0.81591	1
Q9LGH4	74	K	Histone H2B.6	H2B	1	8.0798e-12	176.23	VLK(1)QVHPDIGISSK	2	0.1258	4
Q9LGH4	60	K	Histone H2B.6	H2B	1	0.0190219	124.98	K(1)SVETYK	2	1.8962	1
Q9LGH4	113	K	Histone H2B.6	H2B	0.999336	0.000758806	97.633	YNK(0.999)K(0.001)PTITSR	2	-0.31561	3
Q9LGH4	107	K	Histone H2B.6	H2B	1	0.000612433	107.79	LAAEAAK(1)LAR	3	-0.97514	4
Q9LGH4	11	K	Histone H2B.6	H2B	0.977543	3.83392e-09	140.77	K(0.009)PAAK(0.978)K(0.013)PAEEEPAAEK	3	-0.26406	8
Q9LGH4	136	K	Histone H2B.6	H2B	1	0.000433032	75.548	LVLPGELAK(1)HAVSEGTK	3	-0.70479	2
Q9LGH4	7	K	Histone H2B.6	H2B	0.990597	0.0204779	76.605	AEK(0.009)K(0.991)PAAK	2	0.11005	1
Q9LGH4	144	K	Histone H2B.6	H2B	1	7.72132e-05	111.31	HAVSEGTK(1)AVTK	3	1.3465	4
Q9LGH4	33	K	Histone H2B.6	H2B	0.988036	0.000847499	84.821	APAGK(0.001)K(0.011)PK(0.988)AEK	3	0.67214	2
Q9LGH4	42	K	Histone H2B.6	H2B	1	0.00114499	126.39	RLPAGK(1)GEK	2	-0.14204	3
Q9LGH4	30	K	Histone H2B.6	H2B	0.935208	0.00294804	72.289	AEKAPAGK(0.935)K(0.065)PK	2	0.26542	1
Q9LGH8	107	K	Histone H2B.8	H2B	1	0.000629488	106.2	LAGESAK(1)LAR	2	-0.84308	1
Q9LGI2	45	K	Histone H2B.10	H2B	1	0.00126339	106.88	AEK(1)SSGEGK	2	-0.57191	1
Q9LGI2	22	K	Histone H2B.10	H2B	1	1.77228e-31	246.34	PAEEEPAAEK(1)AEK	2	1.1507	6
Q9LGI2	12	K	Histone H2B.10	H2B	1	4.4434e-06	119.62	K(1)PAEEEPAAEK	2	0.66483	3
Q9LGI2	25	K	Histone H2B.10	H2B	1	0.00916143	79.893	AEK(1)ALAGK	2	0.023877	1
Q0JCT1	122	K	Histone H3.3	H3	1	1.88887e-05	125.97	VTIMPK(1)DIQLAR	3	-1.048	8
Q0JCT1	56	K	Histone H3.3	H3	1	0.000248797	132.88	YQK(1)STELLIR	3	1.1503	2
Q0JCT1	23	K	Histone H3.3	H3	1	0.000794141	116.52	QLATK(1)AAR	2	1.8007	6
Q0JCT1	9	K	Histone H3.3	H3	1	0.00224756	119.75	K(1)STGGKAPR	2	1.5533	1
Q0JCT1	79	K	Histone H3.3	H3	1	1.31155e-05	147.62	EIAQDFK(1)TDLR	2	-0.34767	3
Q7XUC9	91	K	Histone H4	H4	1	1.55873e-07	156.14	TVTAMDVVYALK(1)R	2	-0.47164	6
Q7XUC9	31	K	Histone H4	H4	1	6.82389e-05	113.99	DNIQGITK(1)PAIR	3	-0.51554	2
Q7XUC9	79	K	Histone H4	H4	1	0.000157982	110.44	K(1)TVTAMDVVYALK	2	1.4088	2
Q7XUC9	12	K	Histone H4	H4	0.999996	0.00640246	93.143	GLGK(1)GGAKR	2	1.1035	2
Q7XUC9	8	K	Histone H4	H4	0.999939	0.00372996	89.189	GGK(1)GLGKGGAKR	2	0.49229	2
Q7XUC9	16	K	Histone H4	H4	0.999999	0.00363316	100.02	GLGKGGAK(1)R	2	-0.16629	1

## Sheet: Butyl exp.2
Protein accession	Position	Amino acid	Protein description	Gene name	Localization probability	PEP	Score	Modified sequence	Charge	Mass error [ppm]	MS/MS Count	Rep.1	Rep.2
Q0JCT1	14	K	Histone H3.3	H3	1	0.00722253	86.794	STGGK(1)APR	2	-0.43394	1	*	*

## Sheet: Butyl exp.2 rep.1
Protein accession	Position	Amino acid	Protein description	Gene name	Localization probability	PEP	Score	Modified sequence	Charge	Mass error [ppm]	MS/MS Count
Q0JCT1	14	K	Histone H3.3	H3	1	0.00722253	86.794	STGGK(1)APR	2	-0.43394	1

## Sheet: Butyl exp.2 rep.2
Protein accession	Position	Amino acid	Protein description	Gene name	Localization probability	PEP	Score	Modified sequence	Charge	Mass error [ppm]	MS/MS Count
Q0JCT1	14	K	Histone H3.3	H3	0.999999	0.0130773	82.645	KSTGGK(1)APR	2	-0.22096	1

[truncated: 3 more sheets: Crontonyl exp.2, Crontonyl exp.2 rep.1, Crontonyl exp.2 rep.2]
